# Supplementary material for: B-Lines Scores Derived From Lung Ultrasound Provide Accurate Prediction of Extravascular Lung Water Index: An Observational Study in Critically Ill Patients
Source: PubMed Central journal article supplement (PMC8609506; doi:10.1177/0885066620967655), 2020-11-05
Supplement: Supplementary_file_1.pdf [file Supplementary_file_1.pdf]

Supplementary file 1: Protocol of extensive 28-sector chest scan to assess 28-sector B-Lines score (28s-BL) according to earlier studies [23,24].

| Extensive 28-sector scan protocol for 28s-BL |              |                   |             |              |     |              |             |                   |              |           |  |
|----------------------------------------------|--------------|-------------------|-------------|--------------|-----|--------------|-------------|-------------------|--------------|-----------|--|
| Right side                                   | mid-axillary | anterior-axillary | mid-clavear | para-sternal | ICS | para-sternal | mid-clavear | anterior-axillary | mid-axillary | Left side |  |
|                                              |              |                   |             |              | 2   |              |             |                   |              |           |  |
|                                              |              |                   |             |              | 3   |              |             |                   |              |           |  |
|                                              |              |                   |             |              | 4   |              |             |                   |              |           |  |
|                                              |              |                   |             |              | 5   |              |             |                   |              |           |  |

28-BL: 28-sector B-lines score

ICS: Intercostal space
