# Supplementary material for: B-Lines Scores Derived From Lung Ultrasound Provide Accurate Prediction of Extravascular Lung Water Index: An Observational Study in Critically Ill Patients
Source: PubMed Central journal article supplement (PMC8609506; doi:10.1177/0885066620967655), 2020-11-05
Supplement: Supplementary_file_2.pdf [file Supplementary_file_2.pdf]

**Supplementary file 2: Ultrasound scoring system for simplified 4-sector B-lines score (4s-BL) according to Enghard et al. [26].**

| <b>Ultrasound scoring system for 4s-BL</b> |              |
|--------------------------------------------|--------------|
| <b>Ultrasound finding</b>                  | <b>Score</b> |
| <b>No B line/ICS</b>                       | 0            |
| <b>One B line/ICS</b>                      | 1            |
| <b>Two B lines/ICS</b>                     | 2            |
| <b>Three B lines/ICS</b>                   | 3            |
| <b>Four B lines/ICS</b>                    | 4            |
| <b>Five B lines/ICS</b>                    | 5            |
| <b>Confluent B lines &gt; 50 % ICS</b>     | 6            |
| <b>Confluent B lines &gt; 75 % ICS</b>     | 7            |
| <b>Confluent B lines 100 % ICS</b>         | 8            |

4s-BL: 4-sector B-lines score

ICS: Intercostal space
